# Supplementary material for: Hippo signaling determines the number of venous pole cells that originate from the anterior lateral plate mesoderm in zebrafish
Source: eLife. 2018 May 29;7:e29106. doi: 10.7554/eLife.29106 (PMC5995544; doi:10.7554/eLife.29106)
Supplement: Figure 1—source data 1. [file elife-29106-fig1-data1.xlsx]

## Sheet: Figure 1B
		Figure 1B
				Number of atrial CMs at 74 hpf
		genotype	lats1	+/+	-/-	-/-	+/+	+/-	-/-
			lats2	+/+	+/+	+/-	-/-	-/-	-/-
				100	91	109	137	116	138
				104	101	72	123	122	107
				141	117	121	106	150	116
				133	108	134	128	153	143
				138	125	100	102	126	135
				118	127	116	107	139	140
				117	124	131	136	132	125
				95	134	116		150
				98	123	127		141
				110	92	139		144
				97	112	119		150
				113	101	138		117
					106	119		130
						79		120
						96		124
								96

## Sheet: Figure 1C
		Figure 1C
				Number of ventricular CMs at 74 hpf
		genotype	lats1	+/+	-/-	-/-	+/+	+/-	-/-
			lats2	+/+	+/+	+/-	-/-	-/-	-/-
				138	99	164	145	134	182
				167	162	113	132	144	146
				169	155	171	207	182	138
				125	110	152	104	173	101
				173	169	135	144	138	148
				157	158	152	147	146	152
				123	146	144	154	153	166
				136	145	106		161
				131	136	119		180
				88	152	129		130
				131	144	135		125
				151	162	152		147
					138	134		162
						146		156
						158		160
								179
