# Supplementary material for: Hippo signaling determines the number of venous pole cells that originate from the anterior lateral plate mesoderm in zebrafish
Source: eLife. 2018 May 29;7:e29106. doi: 10.7554/eLife.29106 (PMC5995544; doi:10.7554/eLife.29106)
Supplement: Figure 2—source data 1. [file elife-29106-fig2-data1.xlsx]

## Sheet: Figure 2B
		Figure2B
			Number of isl1+myl7+ cells at 96 hpf
			IFT	OFT
			29	0
			24	0
			22	0
			26	0
			24	0
			33	0
			23	0
			32	0
			17	0
			26	0

## Sheet: Figure 2D
		Figure 2D
		Number of isl1+SHF cells at 26 hpf
		lats1wt/wtlats2wt/wt	lats1wt/ncv107lats2ncv108 or lats1ncv107lats2ncv108
		29	51
		18	31
		22	31
		33	40
		25	31
		27	36
		20	47
		21	27
		11	50
		30	44
		26	70
		22	27
		32	39
		18	46
			30
			34
			61

## Sheet: Figure 2E
		Figure 2E
		Number of isl1+SHF cells at 26 hpf
		control MO	lats1/2 MOs	ajuba MO	ytip-mCh mRNA
		24	40	42	22
		41	34	38	18
		12	43	44	10
		23	37	52	24
		11	50	33	12
		32	34		3
		30	39		16
		20	33		9
		24	35		11
		24	35		4
		26	39		10
		24	64
		22	59
		26	40
		24	54
		27	44
			37
			35
