# Supplementary material for: Hippo signaling determines the number of venous pole cells that originate from the anterior lateral plate mesoderm in zebrafish
Source: eLife. 2018 May 29;7:e29106. doi: 10.7554/eLife.29106 (PMC5995544; doi:10.7554/eLife.29106)
Supplement: Figure 3—source data 1. [file elife-29106-fig3-data1.xlsx]

## Sheet: Figure 3A
		Figure 3A
			Relative mRNA expression level at 24 hpf, normalized by eef1a1l1 mRNA expression
			nkx2.5 mRNA			hand2 mRNA			gata4 mRNA
			control MO	lats1/2 MOs		control MO	lats1/2 MOs		control MO	lats1/2 MOs
		1st	1.04	0.99		1.11	0.944		1.05	1.49
			0.96	0.96		0.89	0.898		0.95	1.5
		2nd	1.03	0.82		1.03	1.43		1.21	0.87
			0.97	0.68		0.97	1.92		0.79	1.13
		3rd	0.91	1.34		1.07	1.65		1.25	0.7
			1.09	1.63		0.93	2.23		0.75	1.04
		4th	1.06	0.76		1.01	1.21		1.17	1.61
			0.94	0.91		0.99	1.82		0.83	1.39

## Sheet: Figure 3D
		Figure 3D
			Number of hand2+myl7+ cells at 26 hpf
			lats1wt/wtlats2wt/wt	lats1ncv107lats2ncv108
			23	48
			19	35
			21	45
			30	42
			19	60
			21	33
			27	40
			27
			17
			22
