# Supplementary material for: Hippo signaling determines the number of venous pole cells that originate from the anterior lateral plate mesoderm in zebrafish
Source: eLife. 2018 May 29;7:e29106. doi: 10.7554/eLife.29106 (PMC5995544; doi:10.7554/eLife.29106)
Supplement: Figure 5—source data 1. [file elife-29106-fig5-data1.xlsx]

## Sheet: Figure 5E
		Figure 5E
			Distance between hand2+ region of ALPM and PLPM
			lats1wt/wt or wt/ncv107	lats1ncv107 or wt/ncv107
			lats2wt/wt or wt/ncv108	lats2ncv108
			271	0
			240	151
			273	127
			248	96
			290	180
			156	182
			231	171
			135	112
			162	0
			161	150
			181	93
			154	166
			157	204
			119	0
			97	123
			172	111
			165	119
			74	30
			148	126
			180	141
			178	126
				0
				84
				167
				172
				45
				51
				32
				22
