# Supplementary material for: Hippo signaling determines the number of venous pole cells that originate from the anterior lateral plate mesoderm in zebrafish
Source: eLife. 2018 May 29;7:e29106. doi: 10.7554/eLife.29106 (PMC5995544; doi:10.7554/eLife.29106)
Supplement: Figure 6—source data 1. [file elife-29106-fig6-data1.xlsx]

## Sheet: Figure 6D
		Figure 6D
			Number of BRE+myl7+ cells at 24 hpf
			lats1wt/wtlats2wt/wt	lats1wt/ncv107lats2ncv108 or lats1ncv107lats2ncv108
			23	42
			38	43
			43	66
			33	80
			41	60
			43	67
			20	110
			28	75
			33	38
			26	83
				27
				52
				59

## Sheet: Figure 6F
		Figure 6F
			Number of isl1+ SHF cells at 26 hpf
			control	smad7 mRNA
			29	12
			24	10
			21	13
			18	13
			20	2
			25	17
			19	7
			19	13
			25	11
				11
				13
				20
				8
				10
				9
				12

## Sheet: Figure 6H
	Figure 6H
		Number of isl1+SHF cells			Number of isl1-CMs
		DMSO	DMH1		DMSO	DMH1
		20	4		123	110
		18	9		96	109
		15	0		126	106
		18	6		105	100
		18	3		108	98
		20	4		94	140
		21	9		110	97
		16	4		118	101
		17	0		107	108
		24	4		97	134
		23	3		103	126
